# Supplementary material for: Design of a core–shell catalyst: an effective strategy for suppressing side reactions in syngas for direct selective conversion to light olefins
Source: Royal Society of Chemistry journal article supplement (doi:10.1039/c9sc05544d), 2020-01-01
Supplement: c9sc05544d1.pdf [file c9sc05544d1.pdf]

## Supplementary Information

### Design of the core-shell catalyst: an effective strategy for suppressing side reactions in syngas to light olefins direct selective conversion

*Li Tan<sup>a,b</sup>, Fan Wang<sup>c</sup>, Peipei Zhang<sup>b</sup>, Yuichi Suzuki<sup>b</sup>, Yingquan Wu<sup>d</sup>, Jiangang Chen<sup>d</sup>, Guohui Yang<sup>b,d,\*</sup> and Noritatsu Tsubaki<sup>b,\*</sup>*

<sup>a</sup> Institute of Molecular Catalysis and Operando Characterization, State Key Laboratory of Photocatalysis on Energy and Environment, College of Chemistry, Fuzhou University, Fuzhou, 350108, China

<sup>b</sup> Department of Applied Chemistry, School of Engineering, University of Toyama, Gofuku 3190, Toyama 930-8555, Japan

<sup>c</sup> Leibniz-Institut für Katalyse e.V. an der Universität Rostock, Albert-Einstein Strasse 29a, 18059 Rostock, Germany

<sup>d</sup> State Key Laboratory of Coal Conversion, Institute of Coal Chemistry, Chinese Academy of Sciences, Taiyuan, 030001, China.

**\*Corresponding author:** [tsubaki@eng.u-toyama.ac.jp](mailto:tsubaki@eng.u-toyama.ac.jp) (Noritatsu Tsubaki)

[thomas@eng.u-toyama.ac.jp](mailto:thomas@eng.u-toyama.ac.jp) (Guohui Yang),

## Materials and Methods

### 1. Catalyst preparation:

The Zn-Cr catalyst was synthesized through a typical co-precipitation method by mixing solution of  $\text{Cr}(\text{NO}_3)_3 \cdot 9\text{H}_2\text{O}$  and  $\text{Zn}(\text{NO}_3)_2 \cdot 6\text{H}_2\text{O}$  (Zn: Cr= 3:1 in molar) with  $(\text{NH}_4)_2\text{CO}_3$  aqueous solution as the precipitant. Precipitation process was performed at 60 °C and pH=7.0-8.0 in a well-stirred container. The precipitate was first aged at room temperature for 24 h, and then washed with deionized water until pH = 7.0. After the followed drying at 120 °C for 12 h, the dried precipitate was further calcined at 350 °C for 6 h to obtain the final catalyst, denoted as Zn-Cr. The samples were granulated to 40-60 meshes.

The SAPO-34 zeolite was synthesized using a hydrothermal method. Aluminum isopropoxide, silica sol (30%), phosphoric acid (85%) and distilled water were mixed and stirred at room temperature. DEA (Diethylamine) was added 1 h later and the resulting mixture was stirred until homogeneous. The gel was heated and crystallized at 200 °C for 24 h. The typical molar composition of the gel was 2.0DEA: 0.6SiO<sub>2</sub>: 1.0Al<sub>2</sub>O<sub>3</sub>: 0.8P<sub>2</sub>O<sub>5</sub>: 50H<sub>2</sub>O. After crystallization, the as-synthesized sample was obtained after centrifugal separation, washing and drying in air at 120 °C. At last the sample calcined at 550 °C for 5 h, denoted as SAPO. The samples were granulated to 40-60 meshes.

The diluted silica sol, as binder, was used to moisten the Zn-Cr core catalyst. And then the prepared SAPO-34 zeolite powder was mixed with the soaked Zn-Cr core catalyst (40-60 meshes) in a round bottomed flask, followed by vigorously shaking. The obtained sample was finally treated by calcination at 500 °C for 2 h increasing the mechanical strength of zeolite shell, denoted as Zn-Cr@SAPO.

The physical mixture catalyst (40-60 meshes) of Zn-Cr and SAPO was prepared by a typical physical mixture method as reference catalyst with the same weight ratio to that of Zn-Cr@SAPO, denoted as Zn-Cr+SAPO.

Two samples were prepared and studied to verify the effects from the silica sol. The Zn-Cr catalyst and SAPO-34 zeolite were moistened separately by the diluted silica

sol, followed by drying and calcining. The samples were granulated to 40-60 meshes. The two samples were denoted as Zn-Cr@SiO<sub>2</sub> and SAPO@SiO<sub>2</sub>, respectively.

## 2. Catalytic reaction tests:

The catalyst evaluation experiments were carried out in a fixed-bed tubular reactor packed with 0.5 g catalyst. The flow rate of feed gas was controlled by a mass flow controller. The catalyst was subjected to in situ reduction in H<sub>2</sub> for 10 h at 400 °C prior to reaction. After the reduction process, syngas was introduced into the reactor for reaction. The reaction conditions were as follows: H<sub>2</sub>/CO=2.0, reaction time=4 h, reaction pressure of 2.0 or 5.0 MPa, space velocity from 2160 to 6480 cm<sup>3</sup>h<sup>-1</sup>g<sub>cat</sub><sup>-1</sup> and reaction temperature from 300 to 450 °C. The typical composition of syngas was H<sub>2</sub> 63.6%, CO 33.2%, Ar 3.2%.

Syngas and exit gas were analyzed by a gas chromatograph equipped with a column of carbon sieves and a thermal conductivity detector (TCD) for the contents of CH<sub>4</sub>, CO and CO<sub>2</sub>. Methanol, DME and hydrocarbons up to C<sub>8</sub> were analyzed by a gas chromatograph equipped with a flame ionization detector (FID). CH<sub>4</sub> was taken as a reference bridge between FID and TCD. CO conversion was calculated on a carbon atom basis, i.e.

$$(1) C_{CO} = (X_{CO, in} - X_{CO, out}) / (X_{CO, in}) \times 100\%$$

C<sub>CO</sub>- Conversion of CO, %;

X<sub>CO, in</sub>-Mole fraction of CO in pristine syngas;

X<sub>CO, out</sub>-Mole fraction of CO in exit gas;

$$(2) Sel_{CO_2} = X_{CO_2, out} / (X_{CO, in} - X_{CO, out}) \times 100\%$$

Sel<sub>CO<sub>2</sub></sub>- Selectivity of CO, %;

X<sub>CO<sub>2</sub>, out</sub>- Mole fraction of CO<sub>2</sub> in exit gas;

$$(3) Sel_i = \frac{R_{i,s} f_{i,m}}{\sum_i R_{i,s} f_{i,m}}$$

Sel<sub>i</sub>- Selectivity of component i, %;

R<sub>i, s</sub>- Area ratio of hydrocarbon in chromatogram;

f<sub>i, m</sub>- Correction of mass.

### 3. Catalyst characterization:

The crystalline structure of the sample was measured by X-ray diffraction (XRD) with a Rigaku RINT 2400 diffractometer employing Cu K $\alpha$  radiation. All samples were scanned at 40 kV and 40 mA in the range of 5-80°. The Thermodynamic chart images of the sample was obtained by a Two-dimensional X-ray (2D-XRD) with a Rigaku Hypix-400 detector. We used 2D slit 0.5mm for Cu of incident soller slit. The camera length was 148.578 mm.

The acidity of catalysts was studied by the temperature programmed desorption (TPD) with BELCAT-B-TT (BEL JAPAN INC.) using NH<sub>3</sub>. TPD of NH<sub>3</sub> was carried out between 50 and 800 °C under a helium flow (30 ml/min) with a heating rate of 10 °C/min. Before the test, the samples were pretreated under helium atmosphere at 500 °C for 1 h, then, cooled to 50 °C, and exposed to pure NH<sub>3</sub> (30 ml/min) for 0.5 h.

Nitrogen adsorption measurements were carried out with a Quantachrome Instruments AUTOSORB-1, and BET surface area and the pore size distribution were determined from the isotherms. The samples were outgassed at 200 °C for 2 h before each test.

The surface morphology and elemental composition were obtained by field-emission scanning electron microscope (FE-SEM, JEOL JSM-6700F) and scanning electron microscope (SEM, JEOL JSM-6360LV) with JED-2300 energy dispersive spectroscopy (EDS) attachment. The samples were per-treated in vacuum at 343 K overnight and sprayed platinum at 10 kv for 200 s before examination.

The H<sub>2</sub> temperature programmed reduction (H<sub>2</sub>-TPR) profiles were recorded in a fixed-bed reactor system equipped with a thermal conductivity detector. The catalyst (100 mg) was pretreated at 400 °C under Ar flow (40 ml/min) and then cooled down to 50 °C under Ar flow. Then H<sub>2</sub>-N<sub>2</sub> (10:90) was introduced into the analysis system. H<sub>2</sub>-TPR profiles were recorded at a temperature rising rate of 5 °C / min from 50 °C to 600 °C.

The fluorescence intensity maps were measured by X-ray fluorescence CT (XRF-CT) with a fluorescence detector (Vertex EX-90). The source light generated by the undulator was sized at 5  $\mu$ m (horizontal) and 5  $\mu$ m (vertical) with 20 keV. The sample

was scanned by horizontal, angular and vertical triple cycle scanning. The matrix can be transformed into the intensity distribution of the fluorescence signal in the horizontal plane of the incident light. Then the distribution images of different elements can be obtained by filling the integrals of these fluorescence peaks into the matrix elements mentioned above. In the experiment, a total of 260 points were collected with 10um horizontal step; 37 points with 180° were scanned with 5° angle; and 9 points were collected with 10um vertical step. The integral time of each point was 0.2 second, the residence time (stability) time of the motor was 0.2 second, plus the motor motion time, each data point took about 0.7 second. The collection time of each section was about 2 hour, and the total experiment time was nearly 1 day. At last, by changing the vertical direction and directing the incident light to different positions of the sample, the cross-section element distribution images of the samples with different positions can be obtained. By superimposing these cross sections, the three-dimensional distribution image of elements can be obtained.

The X-ray photoelectron spectroscopy (XPS) analysis was accomplished by Thermo Fisher Scientific ESCALAB 250Xi multifunctional X-ray photoelectron spectroscope, by which to determine the existence of Cr, Zn and oxygen state on the outward appearance of catalysts. The data processing was performed using Avantage software.

The inductive coupled plasma atomic emission spectrometry (ICP-AES) was employed to determine the real Zn-Cr/SAPO ratio of the catalysts using Perkin Elmer Optima 7300DV atomic emission spectrometry spectrometer.

The in situ FT-IR spectra were recorded with a Bruker Tensor 27 with a MCT detector at the 4000-800  $\text{cm}^{-1}$  range, with a resolution of 4  $\text{cm}^{-1}$  and 64 acquisition scans. The catalyst was reduced by  $\text{H}_2$  in prior to the test. After pretreating by Ar,  $\text{C}_2\text{H}_4$  and  $\text{C}_3\text{H}_6$  were introduced for adsorption at 300 or 400 °C under 2 MPa or atmospheric pressure, respectively, then after pressure rapidly released, the catalyst was under a flow of Ar for desorption for 6 or 10 min. Ultimately, the temperature was cooled down in Ar, and the  $\text{CO}_2$  formation on catalysts was investigated under a flow of syngas at 300 or 400 °C under 2 MPa or atmospheric pressure, respectively.

The catalysts carbon deposition behavior was investigated by thermo gravimetric analysis (DTA/TGA-60, Shimadzu). The samples were heated at a rate of 10 °C/min from room temperature to 800 °C in air flow.

Raman spectra were recorded with a Renishaw inVia 2000 Raman microscope by using an Ar<sup>+</sup> ion laser at 514.5 nm wavelength.

The diffuse reflectance (DR) UV–vis spectra of used catalysts were recorded on an Agilent Cary 5000 UV–vis–NIR spectrophotometer

#### 4. Theoretical Calculations

All calculations were conducted by using the plane-wave based density functional theory (DFT) method implemented in the Vienna ab initio simulation package (VASP). The interaction of electron and ion was described by the projector augmented wave (PAW) method.<sup>[1]</sup> The electron exchange and correlation energy were treated within the generalized gradient approximation in the Perdew-Burke-Ernzerhof formalism (GGA-PBE).<sup>[2]</sup> To have accurate energies with errors less than 1 meV per atom, a cutoff energy of 400 eV and the Gaussian electron smearing method with  $\sigma = 0.10$  eV were used. Geometry optimization was converged until the forces acting on the atoms were smaller than 0.05 eV/Å, whereas the energy threshold-defining self-consistency of the electron density was set to  $10^{-4}$  eV. The adsorption energy ( $E_{\text{ads}}$ ) was calculated by subtracting the energies of gas-phase species and the clean surface from the total energy of the adsorbed species (X),  $E_{\text{ads}} = E(\text{X/slab}) - [E(\text{X}) + E(\text{slab})]$ , where  $E(\text{X/slab})$  is the total energy of the slab with one X molecule,  $E(\text{slab})$  is the total energy of the bare slab and  $E(\text{X})$  is the total energy of a free X molecule in gas phase. Therefore, the more negative the  $E_{\text{ads}}$  the stronger the adsorption. The calculated energies also included the zero-point energy (ZPE) which was calculated based on the molecular vibration analysis.<sup>[3]</sup> For H-SAPO34, the methods DFT-D3 was adopted to correct van der Waals (vdW) interaction. A  $3 \times 3 \times 3$  Monkhorst-Pack k-point grid was used for sampling the Brillouin zone. A model of spinel  $\text{ZnCr}_2\text{O}_4(111)$  surface with 12 atomic layers (with the top six layers relaxed and the bottom six layers fixed) and the vacuum thickness of 20 Å were used to study all adsorption process. A  $3 \times 3 \times 1$  Monkhorst-Pack k-point grid was utilized for sampling the Brillouin zone.

**Table S1.** Catalytic data in CO hydrogenation of different space velocity. <sup>a</sup>

| Catalyst                            | SV<br>(cm <sup>3</sup> h <sup>-1</sup> g <sub>cat</sub> <sup>-1</sup> ) | CO<br>Con. (%) | CO <sub>2</sub><br>Sel.(%) | Products distribution (%) <sup>b</sup> |                 |                               |                                |                                  |                  |                  |                  |        |
|-------------------------------------|-------------------------------------------------------------------------|----------------|----------------------------|----------------------------------------|-----------------|-------------------------------|--------------------------------|----------------------------------|------------------|------------------|------------------|--------|
|                                     |                                                                         |                |                            | MeOH                                   | CH <sub>4</sub> | C <sub>2</sub> H <sub>6</sub> | C <sub>3</sub> ~C <sub>4</sub> | C <sub>2</sub> ~C <sub>4</sub> = | C <sub>5</sub> = | n-C <sub>5</sub> | i-C <sub>5</sub> | others |
| Zn-Cr                               | 2160                                                                    | 17.71          | 47.14                      | 3.81                                   | 59.86           | 14.15                         | 6.34                           | 13.80                            | 0.61             | 1.31             | 0.13             | 0      |
|                                     | 4320                                                                    | 8.55           | 48.82                      | 6.82                                   | 55.68           | 8.91                          | 4.18                           | 22.57                            | 0.55             | 0.98             | 0.31             | 0      |
|                                     | 6480                                                                    | 5.60           | 49.86                      | 8.82                                   | 56.19           | 7.03                          | 3.36                           | 23.01                            | 0.49             | 0.84             | 0.26             | 0      |
| Zn-Cr+SAPO-<br>2 steps <sup>c</sup> | 2160                                                                    | 22.28          | 41.53                      | 5.66                                   | 52.05           | 12.58                         | 12.10                          | 15.69                            | 0.48             | 1.15             | 0.10             | 0.19   |
|                                     | 4320                                                                    | 10.76          | 47.52                      | 6.70                                   | 49.56           | 10.64                         | 7.54                           | 24.04                            | 0.53             | 0.88             | 0.10             | 0      |
|                                     | 6480                                                                    | 7.76           | 45.50                      | 4.45                                   | 52.58           | 8.33                          | 5.63                           | 27.86                            | 0.44             | 0.71             | 0                | 0      |
| Zn-Cr+SAPO <sup>c</sup>             | 2160                                                                    | 30.39          | 45.89                      | 0.09                                   | 11.46           | 16.32                         | 47.70                          | 19.74                            | 1.49             | 2.31             | 0.05             | 0.83   |
|                                     | 4320                                                                    | 14.50          | 45.88                      | 0.27                                   | 13.18           | 11.83                         | 37.91                          | 33.56                            | 1.58             | 1.67             | 0                | 0      |
|                                     | 6480                                                                    | 9.82           | 46.92                      | 0.56                                   | 14.30           | 9.02                          | 33.54                          | 39.70                            | 1.50             | 1.38             | 0                | 0      |
| Zn-<br>Cr@SAPO <sup>c</sup>         | 2160                                                                    | 31.41          | 36.58                      | 0.03                                   | 8.90            | 10.29                         | 31.74                          | 45.28                            | 1.27             | 2.09             | 0.08             | 0.32   |
|                                     | 4320                                                                    | 16.85          | 35.83                      | 0.18                                   | 9.15            | 7.69                          | 24.81                          | 55.53                            | 1.28             | 1.36             | 0                | 0      |
|                                     | 6480                                                                    | 10.69          | 36.16                      | 0.42                                   | 8.39            | 6.32                          | 18.33                          | 64.31                            | 1.15             | 1.08             | 0                | 0      |

<sup>a</sup> Reaction condition: H<sub>2</sub>/CO=2.0, P=2.0 MPa, T=400 °C, Reaction time =4 h. <sup>b</sup> All the products except CO<sub>2</sub>. <sup>c</sup> The weight ratio of ZnCr and SAPO is 4:1.

**Table S2.** Catalytic data in CO hydrogenation of different temperature under 2.0 MPa. <sup>a</sup>

| Catalyst                            | Temp.<br>(°C) | CO<br>Con.(%) | CO <sub>2</sub><br>Sel.(%) | Products distribution (%) <sup>b</sup> |                 |                               |                                |                                             |                             |                  |                  |        |
|-------------------------------------|---------------|---------------|----------------------------|----------------------------------------|-----------------|-------------------------------|--------------------------------|---------------------------------------------|-----------------------------|------------------|------------------|--------|
|                                     |               |               |                            | MeOH                                   | CH <sub>4</sub> | C <sub>2</sub> H <sub>6</sub> | C <sub>3</sub> ~C <sub>4</sub> | C <sub>2</sub> ~C <sub>4</sub> <sup>=</sup> | C <sub>5</sub> <sup>=</sup> | n-C <sub>5</sub> | i-C <sub>5</sub> | others |
| Zn-Cr                               | 300           | 3.47          | 34.91                      | 92.58                                  | 4.32            | 0.37                          | 0.31                           | 2.42                                        | 0                           | 0                | 0                | 0      |
|                                     | 350           | 3.53          | 43.91                      | 49.92                                  | 30.05           | 3.62                          | 1.71                           | 13.65                                       | 0.56                        | 0.48             | 0                | 0      |
|                                     | 400           | 5.60          | 49.86                      | 8.82                                   | 56.19           | 7.03                          | 3.36                           | 23.01                                       | 0.49                        | 0.84             | 0.26             | 0      |
|                                     | 450           | 10.99         | 44.17                      | 0.77                                   | 60.56           | 13.21                         | 5.76                           | 17.88                                       | 0.67                        | 1.00             | 0.14             | 0      |
| Zn-Cr+SAPO-<br>2 steps <sup>c</sup> | 300           | 2.08          | 29.90                      | 80.41                                  | 9.87            | 1.06                          | 0.23                           | 7.90                                        | 0                           | 0                | 0                | 0.53   |
|                                     | 350           | 4.80          | 30.14                      | 49.76                                  | 26.81           | 4.61                          | 2.93                           | 13.75                                       | 0.50                        | 0.67             | 0                | 0.97   |
|                                     | 400           | 7.76          | 45.50                      | 4.45                                   | 52.58           | 8.33                          | 5.63                           | 27.86                                       | 0.44                        | 0.71             | 0                | 0      |
|                                     | 450           | 15.60         | 44.58                      | 2.28                                   | 58.90           | 13.14                         | 8.54                           | 15.63                                       | 0.48                        | 0.92             | 0.12             | 0      |
| Zn-Cr+SAPO <sup>c</sup>             | 300           | 3.44          | 12.11                      | 65.30                                  | 11.21           | 0.54                          | 3.56                           | 19.39                                       | 0                           | 0                | 0                | 0      |
|                                     | 350           | 6.18          | 25.36                      | 43.45                                  | 14.17           | 3.57                          | 12.34                          | 23.21                                       | 1.22                        | 1.32             | 0                | 0.72   |
|                                     | 400           | 9.82          | 46.92                      | 0.56                                   | 14.30           | 9.02                          | 33.54                          | 39.70                                       | 1.50                        | 1.38             | 0                | 0      |
|                                     | 450           | 11.18         | 47.96                      | 0.22                                   | 54.04           | 18.32                         | 14.27                          | 10.69                                       | 0.68                        | 1.71             | 0.07             | 0      |
| Zn-<br>Cr@SAPO <sup>c</sup>         | 300           | 3.92          | 6.44                       | 73.83                                  | 6.13            | 0.31                          | 1.14                           | 18.16                                       | 0.44                        | 0                | 0                | 0      |
|                                     | 350           | 6.19          | 18.41                      | 37.89                                  | 7.67            | 11.86                         | 5.71                           | 35.25                                       | 1.02                        | 0.60             | 0                | 0      |
|                                     | 400           | 10.69         | 36.16                      | 0.42                                   | 8.39            | 6.32                          | 18.33                          | 64.31                                       | 1.15                        | 1.08             | 0                | 0      |
|                                     | 450           | 12.99         | 40.35                      | 0                                      | 49.08           | 19.32                         | 10.61                          | 17.97                                       | 0.60                        | 2.08             | 0.11             | 0.24   |

<sup>a</sup> Reaction condition: H<sub>2</sub>/CO=2.0, P=2.0 MPa, Space velocity=6480 cm<sup>3</sup>h<sup>-1</sup>g<sub>cat</sub><sup>-1</sup>, Reaction time =4 h.<sup>b</sup> All the products except CO<sub>2</sub>. <sup>c</sup> The weight ratio of ZnCr and SAPO is 4:1.



**Table S3.** Catalytic data in CO hydrogenation of different temperature under 5.0 MPa. <sup>a</sup>

| Catalyst                            | Temp.<br>(°C) | CO<br>Con.(%) | CO <sub>2</sub><br>Sel.(%) | Products distribution (%) <sup>b</sup> |                 |                               |                                |                                             |                             |                  |                  |        |
|-------------------------------------|---------------|---------------|----------------------------|----------------------------------------|-----------------|-------------------------------|--------------------------------|---------------------------------------------|-----------------------------|------------------|------------------|--------|
|                                     |               |               |                            | MeOH                                   | CH <sub>4</sub> | C <sub>2</sub> H <sub>6</sub> | C <sub>3</sub> ~C <sub>4</sub> | C <sub>2</sub> ~C <sub>4</sub> <sup>=</sup> | C <sub>5</sub> <sup>=</sup> | n-C <sub>5</sub> | i-C <sub>5</sub> | others |
| Zn-Cr                               | 300           | 4.46          | 35.12                      | 82.98                                  | 7.80            | 1.52                          | 1.37                           | 5.32                                        | 0.39                        | 0.27             | 0                | 0.35   |
|                                     | 350           | 10.69         | 48.50                      | 60.91                                  | 21.62           | 5.76                          | 2.64                           | 7.83                                        | 0.51                        | 0.54             | 0.05             | 0.15   |
|                                     | 400           | 11.94         | 44.52                      | 23.57                                  | 52.31           | 11.89                         | 4.18                           | 7.15                                        | 0.30                        | 0.52             | 0.07             | 0      |
|                                     | 450           | 19.83         | 45.89                      | 2.98                                   | 67.87           | 15.33                         | 6.27                           | 6.45                                        | 0.30                        | 0.62             | 0.14             | 0.04   |
| Zn-Cr+SAPO-<br>2 steps <sup>c</sup> | 300           | 5.79          | 19.57                      | 75.89                                  | 10.17           | 1.64                          | 2.37                           | 8.88                                        | 0.59                        | 0.35             | 0                | 0.10   |
|                                     | 350           | 11.31         | 35.64                      | 68.61                                  | 13.52           | 5.55                          | 4.74                           | 6.67                                        | 0.23                        | 0.46             | 0.22             | 0      |
|                                     | 400           | 13.55         | 45.88                      | 8.66                                   | 54.13           | 12.67                         | 14.66                          | 8.96                                        | 0.21                        | 0.44             | 0.06             | 0.12   |
|                                     | 450           | 24.38         | 46.76                      | 1.33                                   | 60.23           | 9.45                          | 19.72                          | 8.15                                        | 0.13                        | 0.43             | 0.11             | 0.45   |
| Zn-Cr+SAPO <sup>c</sup>             | 300           | 5.79          | 19.57                      | 75.89                                  | 10.17           | 1.64                          | 2.37                           | 8.88                                        | 0.59                        | 0.35             | 0                | 0.10   |
|                                     | 350           | 11.31         | 25.64                      | 68.61                                  | 13.52           | 5.55                          | 4.74                           | 6.67                                        | 0.23                        | 0.46             | 0.22             | 0      |
|                                     | 400           | 25.73         | 44.13                      | 2.26                                   | 15.16           | 15.96                         | 35.59                          | 20.23                                       | 0.74                        | 0.92             | 0.05             | 0.10   |
|                                     | 450           | 31.41         | 48.38                      | 0.18                                   | 45.95           | 17.93                         | 27.38                          | 5.58                                        | 0.46                        | 2.12             | 0.07             | 0.32   |
| Zn-<br>Cr@SAPO <sup>c</sup>         | 300           | 6.79          | 11.66                      | 75.54                                  | 12.41           | 2.60                          | 3.74                           | 5.06                                        | 0.25                        | 0.40             | 0                | 0      |
|                                     | 350           | 11.80         | 20.49                      | 65.70                                  | 13.15           | 3.74                          | 5.78                           | 1.95                                        | 0.34                        | 0.34             | 0                | 0      |
|                                     | 400           | 26.35         | 39.12                      | 5.88                                   | 18.97           | 13.55                         | 37.40                          | 22.69                                       | 0.61                        | 0.85             | 0.05             | 0      |
|                                     | 450           | 40.71         | 42.03                      | 0.05                                   | 54.06           | 10.18                         | 16.46                          | 16.02                                       | 0.36                        | 2.39             | 0.14             | 0.34   |

<sup>a</sup> Reaction condition: H<sub>2</sub>/CO=2.0, P=5.0 MPa, Space velocity=6480 cm<sup>3</sup>h<sup>-1</sup>g<sub>cat</sub><sup>-1</sup>, Reaction time =4 h.<sup>b</sup> All the products except CO<sub>2</sub>. <sup>c</sup> The weight ratio of ZnCr and SAPO is 4:1.

**Table S4.** Texture parameters of varied catalysts.

| Sample     | Surface Area(m <sup>2</sup> /g) <sup>a</sup> | Pore Volume (cm <sup>3</sup> /g) <sup>a</sup> | Average Pore Diameter (nm) <sup>a</sup> | Zn-Cr/SAPO weight ratio <sup>b</sup> |
|------------|----------------------------------------------|-----------------------------------------------|-----------------------------------------|--------------------------------------|
| Zn-Cr      | 81.5                                         | 0.36                                          | 17.63                                   | /                                    |
| SAPO       | 308.0                                        | 0.11                                          | 1.45                                    | /                                    |
| Zn-Cr@SAPO | 226.2                                        | 0.52                                          | 9.15                                    | 4:1                                  |

<sup>a</sup> Calculated by BET method. <sup>b</sup> Measured by ICP-AES.

**Table S5.** Catalytic data in CO hydrogenation of different H<sub>2</sub>/CO ratios. <sup>a</sup>

| Catalyst                | H <sub>2</sub> /CO | CO Con. (%) | CO <sub>2</sub> Sel.(%) | Products distribution (%) <sup>b</sup> |                 |                               |                                |                                  |                  |                  |                  |        |
|-------------------------|--------------------|-------------|-------------------------|----------------------------------------|-----------------|-------------------------------|--------------------------------|----------------------------------|------------------|------------------|------------------|--------|
|                         |                    |             |                         | MeOH                                   | CH <sub>4</sub> | C <sub>2</sub> H <sub>6</sub> | C <sub>3</sub> ~C <sub>4</sub> | C <sub>2</sub> ~C <sub>4</sub> = | C <sub>5</sub> = | n-C <sub>5</sub> | i-C <sub>5</sub> | others |
| Zn-Cr@SAPO <sup>c</sup> | 2                  | 10.69       | 36.16                   | 0.42                                   | 8.39            | 6.32                          | 18.33                          | 64.31                            | 1.15             | 1.08             | 0                | 0      |
| Zn-Cr@SAPO <sup>c</sup> | 1                  | 8.99        | 36.01                   | 0.55                                   | 18.45           | 7.99                          | 15.41                          | 55.79                            | 0.98             | 0.83             | 0                | 0      |

<sup>a</sup> Reaction condition: Space velocity=6480 cm<sup>3</sup>h<sup>-1</sup>g<sub>cat</sub><sup>-1</sup>, P=2.0 MPa, T=400 °C, Reaction time =4 h.

<sup>b</sup> All the products except CO<sub>2</sub>. <sup>c</sup> The weight ratio of ZnCr and SAPO is 4:1.

**Table S6.** Catalytic data in CO hydrogenation of different catalysts. <sup>a</sup>

| Catalyst                                                   | CO<br>Con. (%) | CO <sub>2</sub><br>Sel.(%) | Products distribution (%) <sup>b</sup> |                 |                               |                                |                                             |                             |                  |                  |        |
|------------------------------------------------------------|----------------|----------------------------|----------------------------------------|-----------------|-------------------------------|--------------------------------|---------------------------------------------|-----------------------------|------------------|------------------|--------|
|                                                            |                |                            | MeOH                                   | CH <sub>4</sub> | C <sub>2</sub> H <sub>6</sub> | C <sub>3</sub> ~C <sub>4</sub> | C <sub>2</sub> ~C <sub>4</sub> <sup>=</sup> | C <sub>5</sub> <sup>=</sup> | n-C <sub>5</sub> | i-C <sub>5</sub> | others |
| Zn-Cr+SAPO <sup>c</sup>                                    | 9.82           | 46.92                      | 0.56                                   | 14.30           | 9.02                          | 33.54                          | 39.70                                       | 1.50                        | 1.38             | 0                | 0      |
| Zn-Cr@SiO <sub>2</sub> +SAPO@SiO <sub>2</sub> <sup>c</sup> | 9.66           | 47.12                      | 0.55                                   | 14.45           | 7.99                          | 35.41                          | 38.79                                       | 1.41                        | 1.40             | 0                | 0      |

<sup>a</sup> Reaction condition: Space velocity=6480 cm<sup>3</sup>h<sup>-1</sup>g<sub>cat</sub><sup>-1</sup>, P=2.0 MPa, T=400 °C, Reaction time =4 h.

<sup>b</sup> All the products except CO<sub>2</sub>. <sup>c</sup> The weight ratio of ZnCr and SAPO is 4:1.

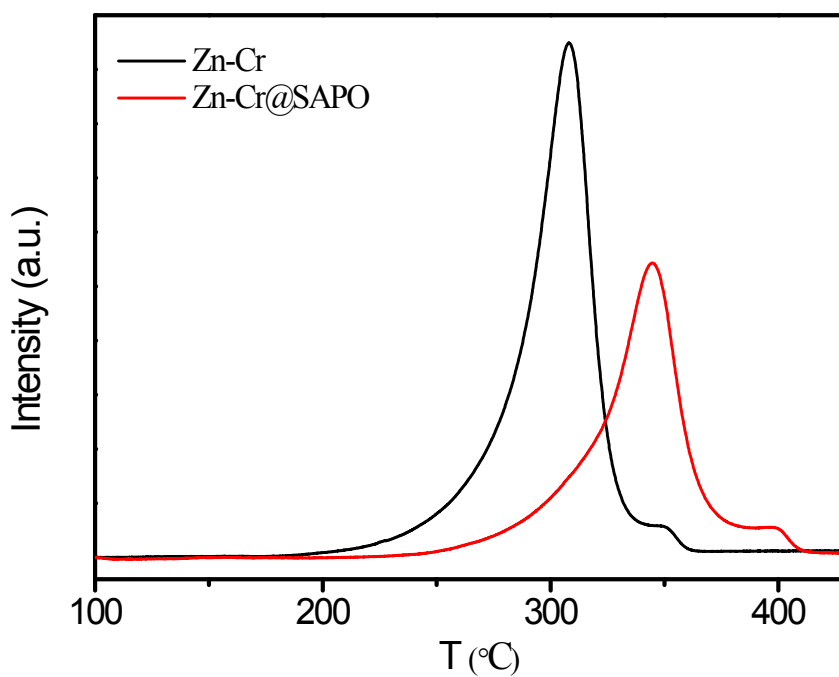**Figure S1.** H<sub>2</sub>-TPR of Zn-Cr metallic oxide and capsule catalysts.

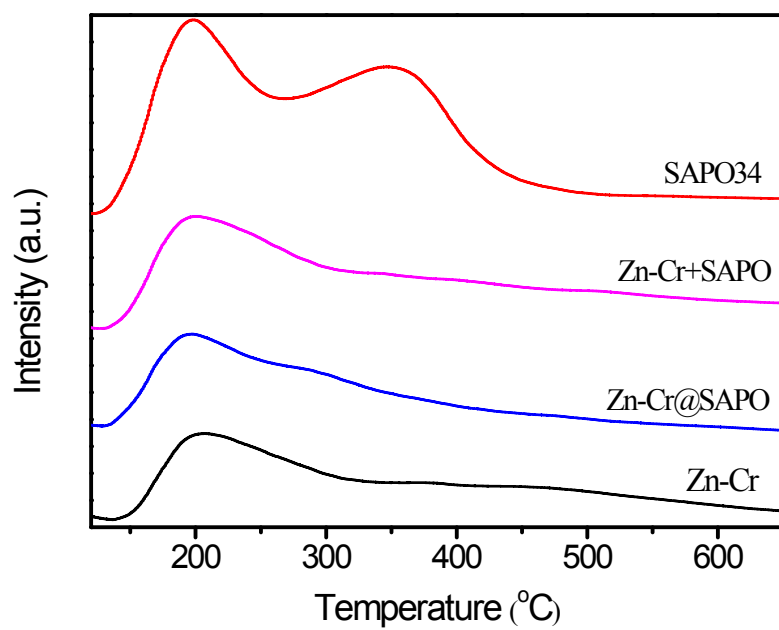

**Figure S2.** NH<sub>3</sub>-TPD of various samples.

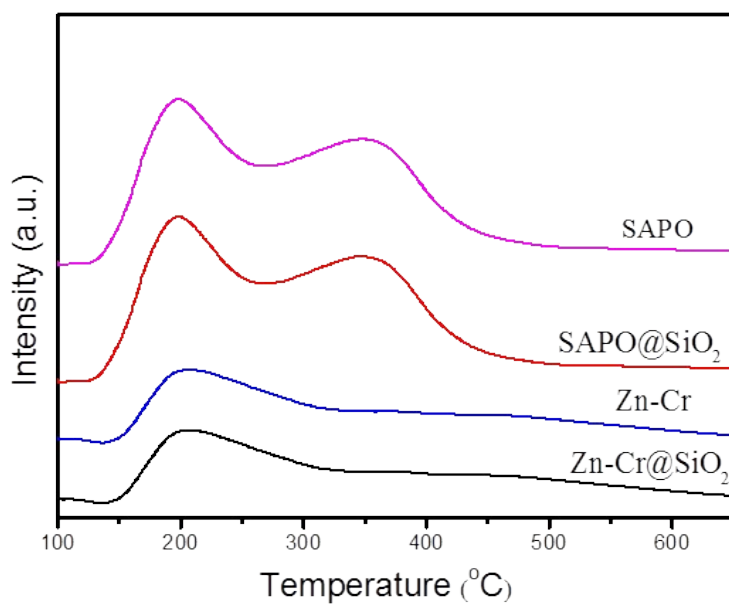

**Figure S3.** NH<sub>3</sub>-TPD of the catalysts modified by diluted silica sol.

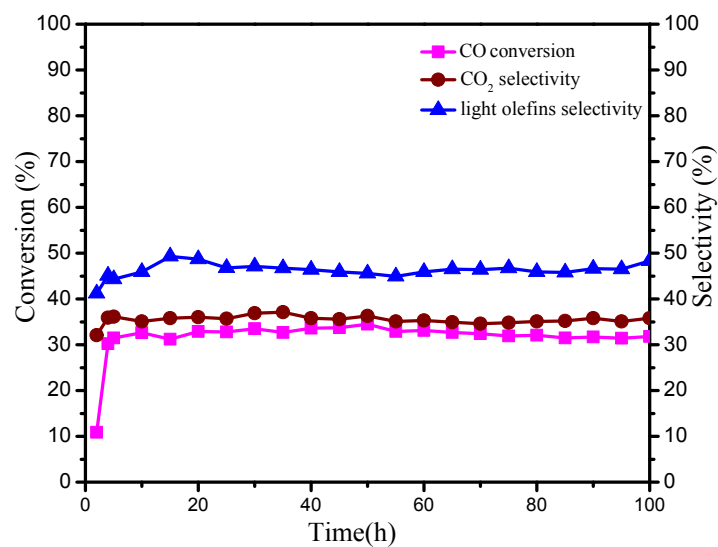

**Figure S4.** The stability of Zn-Cr@SAPO capsule catalyst in the light olefins synthesis reaction. Reaction condition: H<sub>2</sub>/CO=2.0, P=2.0 MPa, T=400 °C, Space velocity=2160 cm<sup>3</sup>h<sup>-1</sup>g<sub>cat</sub><sup>-1</sup>. The weight ratio of ZnCr and SAPO is 4:1.

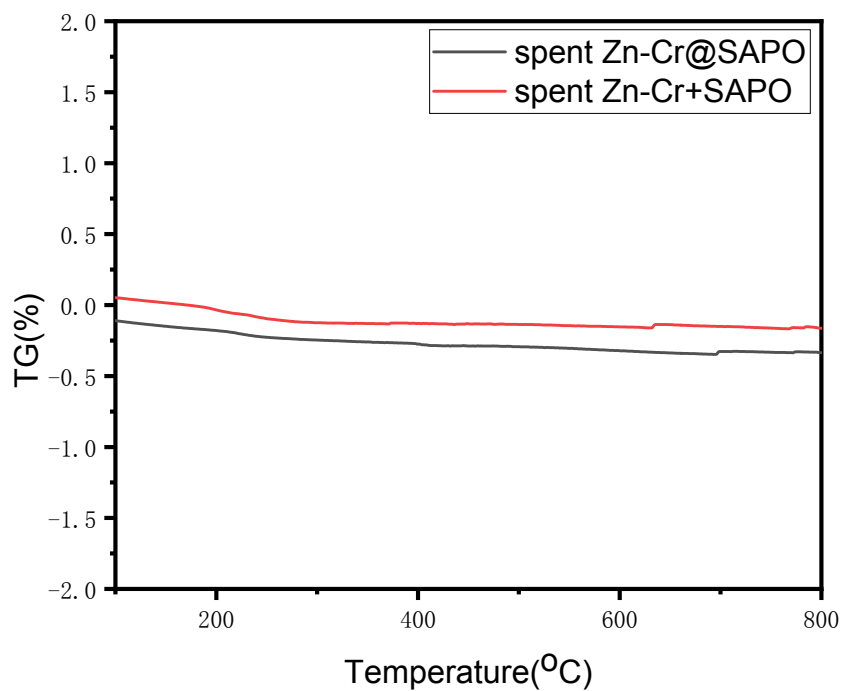

**Figure S5.** TG results for the spent catalysts.

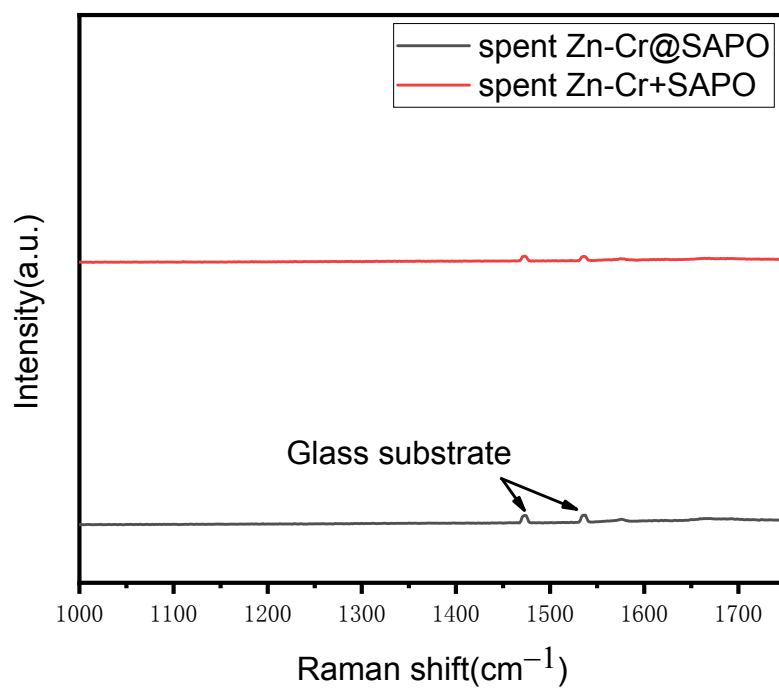

**Figure S6.** Raman spectra for the spent catalysts.

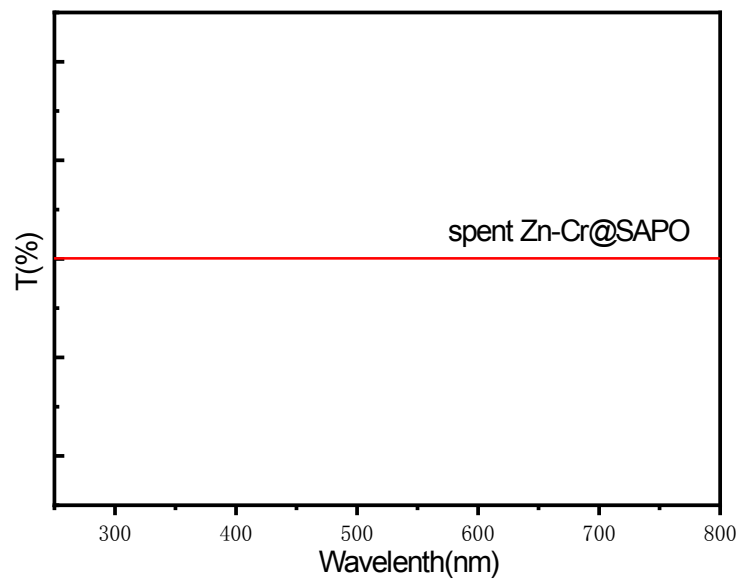

**Figure S7.** UV-Vis spectra of the spent capsule catalyst.

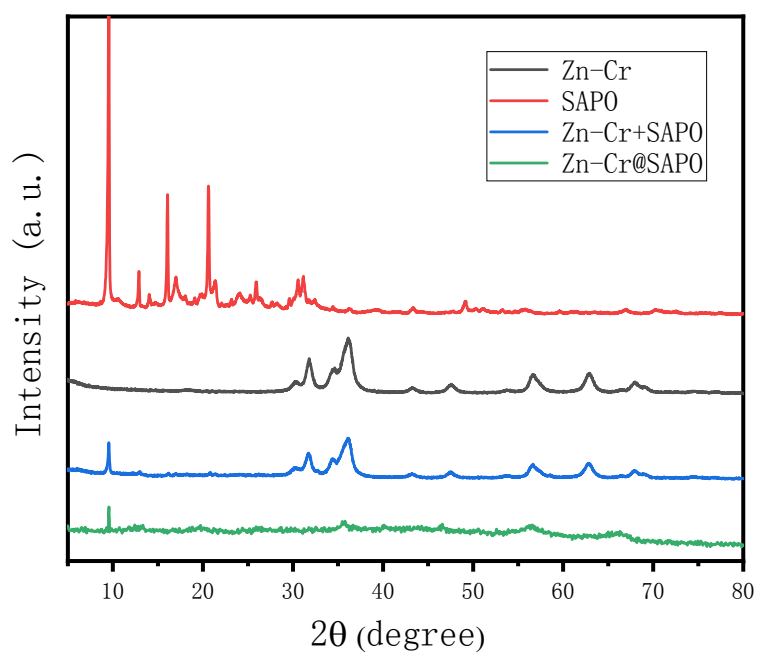

**Figure S8.** XRD patterns of Zn-Cr catalyst, SAPO-34 zeolite, Zn-Cr and SAPO physical mixture catalyst, Zn-Cr@SAPO capsule catalyst.

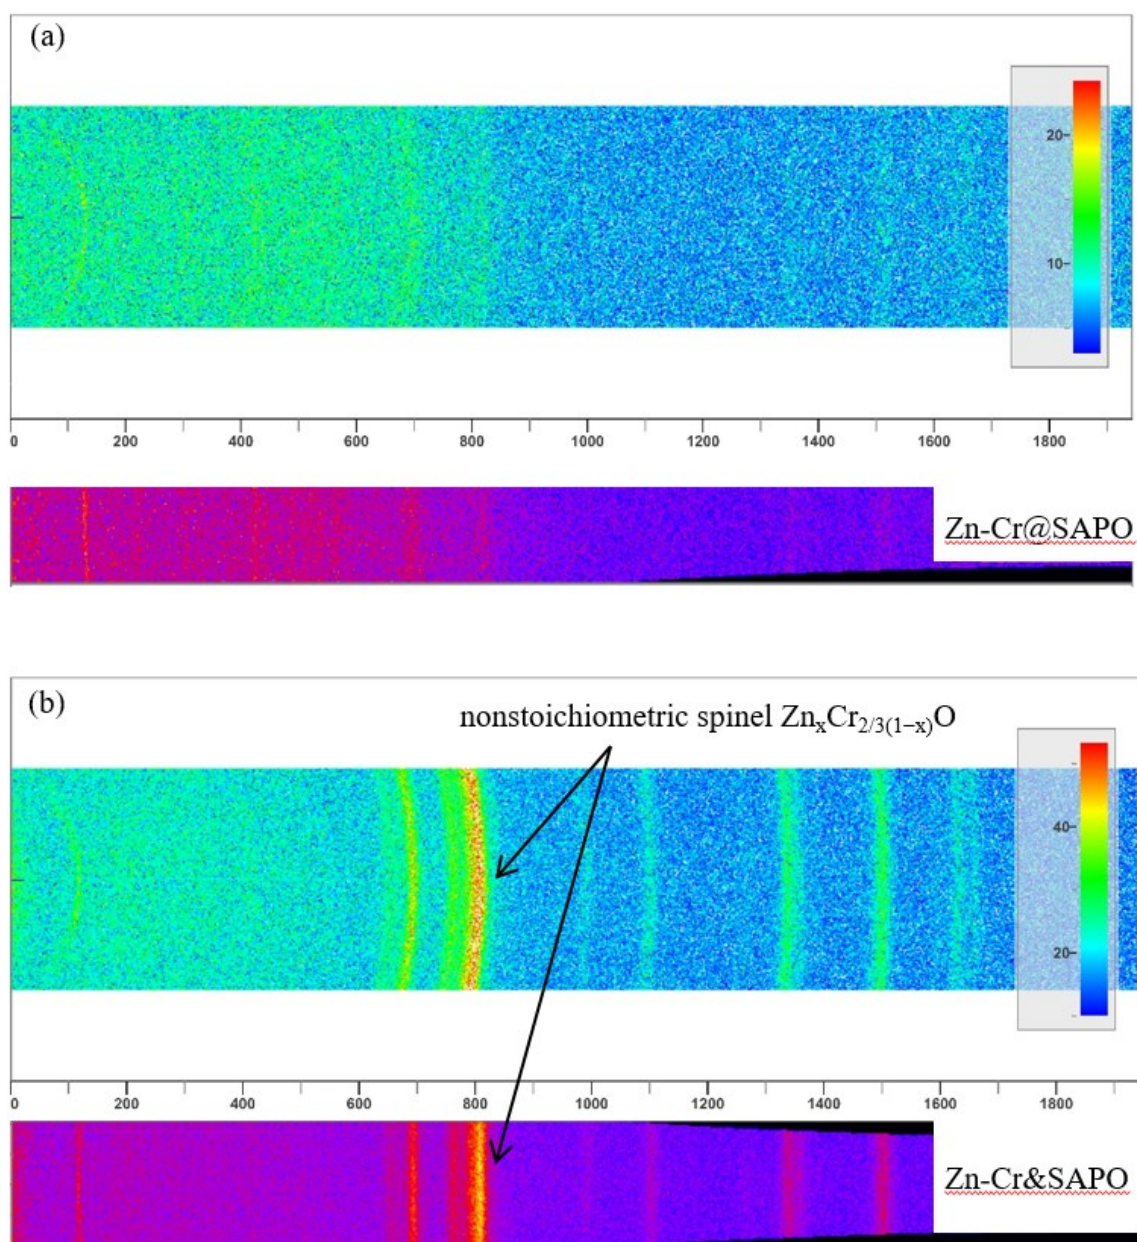

**Figure S9.** 2D-XRD images of Zn-Cr@SAPO capsule (a) and Zn-Cr+SAPO physical mixture (b) catalysts.



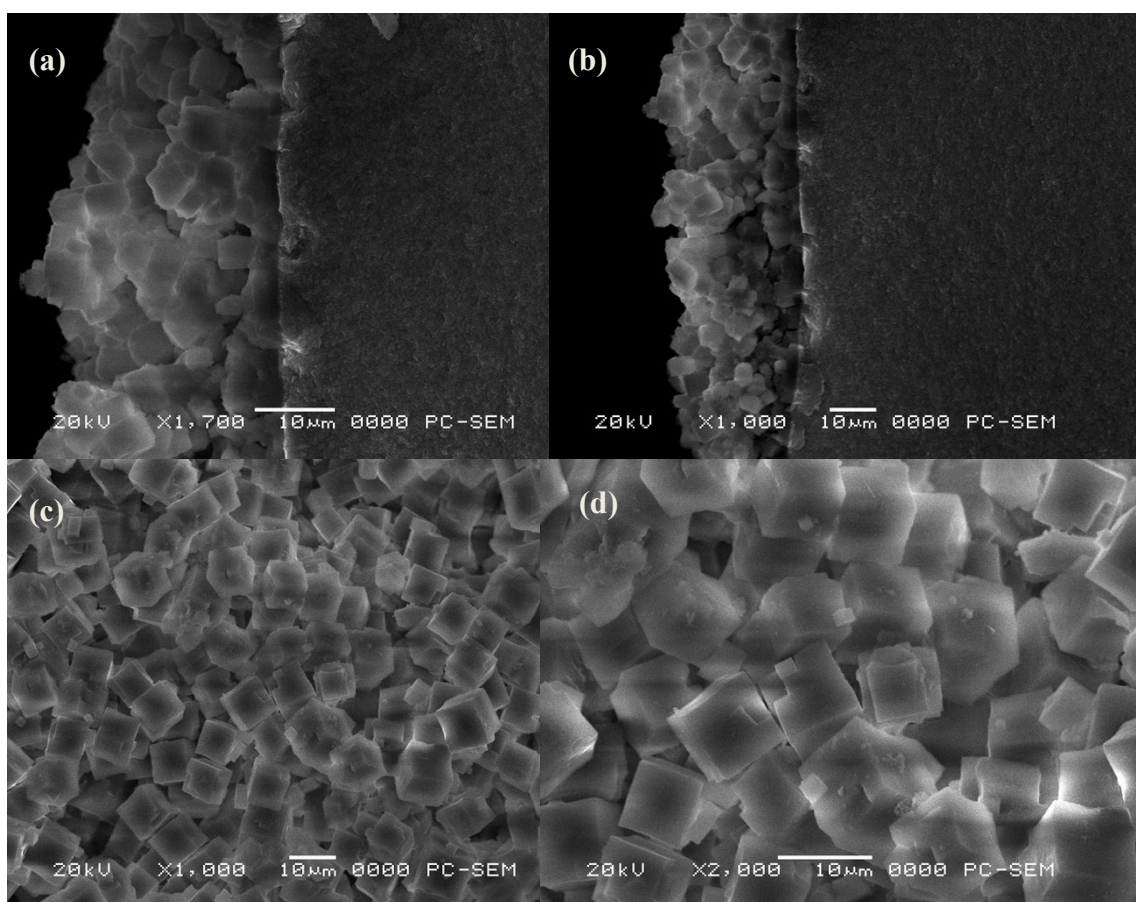

**Figure S10.** The SEM images of section of Zn-Cr@SAPO capsule catalyst (a, b) and the surface of SAPO34 zeolite (c, d).

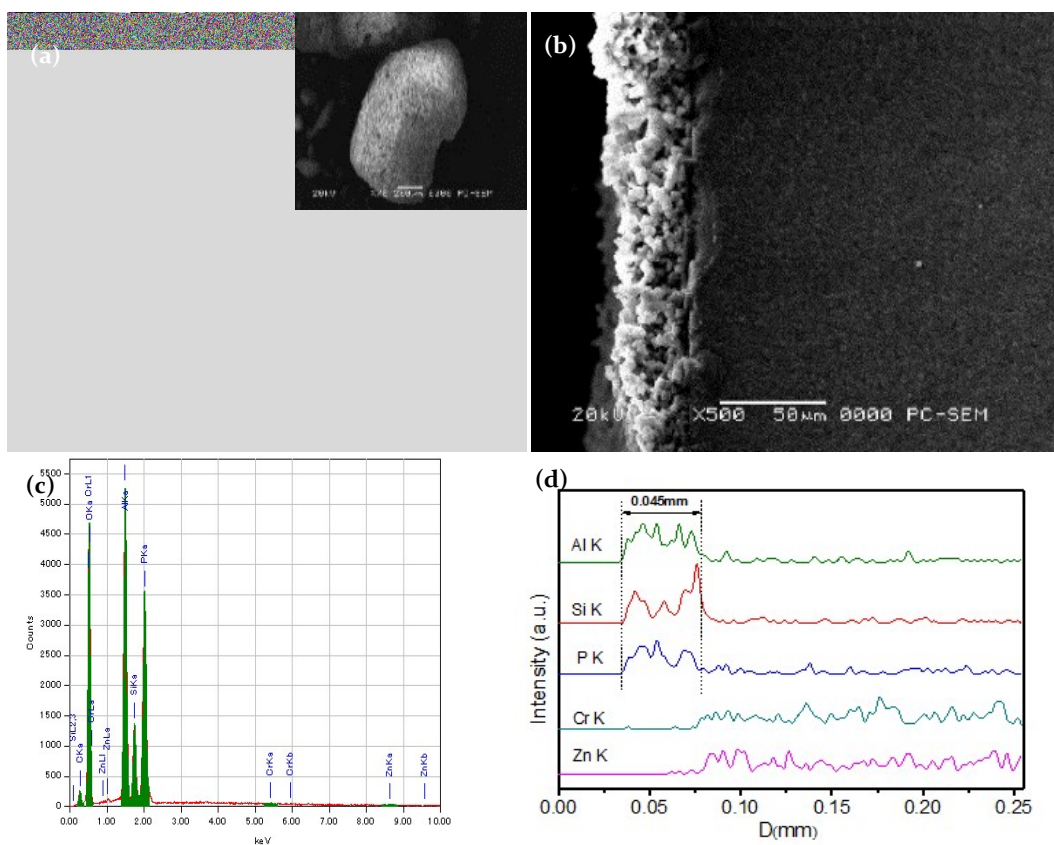

**Figure S11.** The SEM images (inset: morphology under lower magnification) of (a) the surface of Zn-Cr@SAPO catalyst, (b) section of Zn-Cr@SAPO catalyst, and EDS analysis of (c) surface of Zn-Cr@SAPO, (d) Zn-Cr@SAPO catalyst (linear scanning of section).

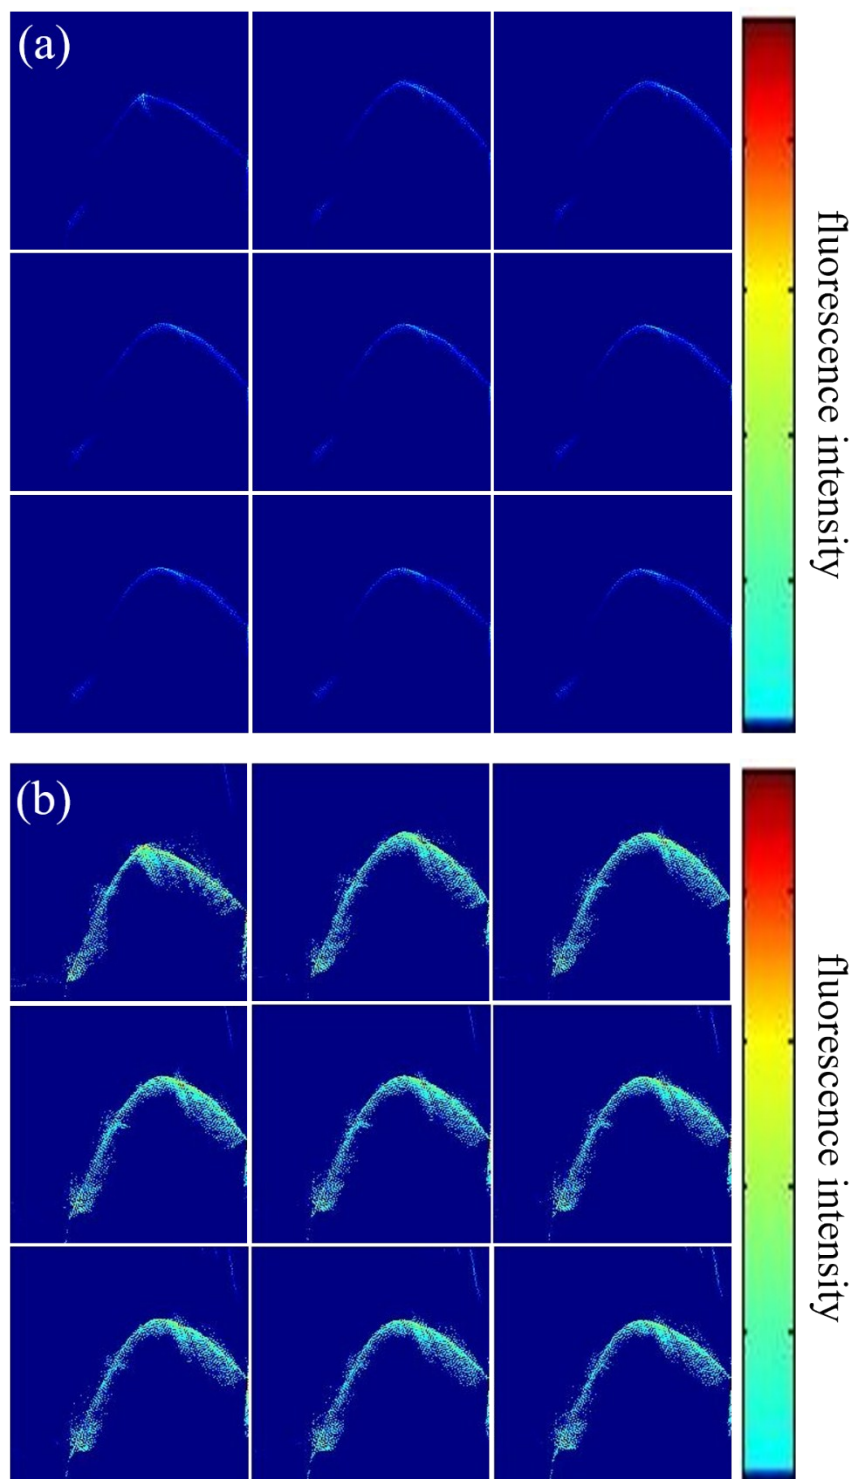

**Figure S12.** The fluorescence intensity images of Cr (a) and Zn (b) elements of Zn-Cr@SAPO capsule catalyst in 9 different positions.

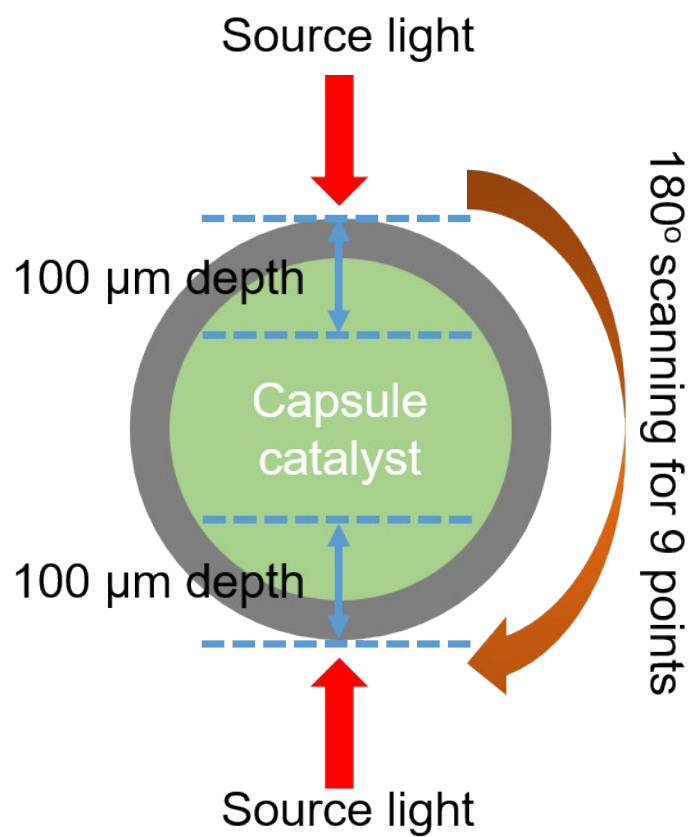

**Figure S13.** The diagram of XRF-CT method for Zn-Cr@SAPO capsule catalyst studying.

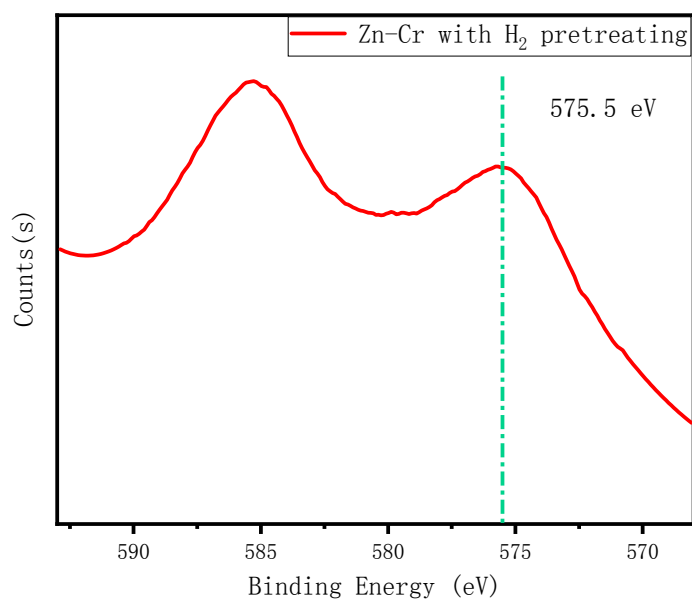

**Figure S14.** XPS Cr2p spectra of Zn-Cr catalyst after H<sub>2</sub> activation in prior to reaction.

**Table S7.** The concentration of OH, O<sub>defect</sub> and O<sub>lattice</sub> in Zn-Cr catalyst.

| Catalyst         | OH (%) | O <sub>defect</sub> (%) <sup>a</sup> | O <sub>lattice</sub> (%) | O <sub>defect</sub> /O <sub>lattice</sub> |
|------------------|--------|--------------------------------------|--------------------------|-------------------------------------------|
| Zn-Cr(fresh)     | 21.56  | 34.61                                | 43.83                    | 0.79                                      |
| Zn-Cr(activated) | 63.74  | 33.49                                | 2.77                     | 12.09                                     |

<sup>a</sup> The O<sub>defect</sub> concentration is the fraction of surface oxygen atoms adjacent to a defect calculated from the de-convoluted O1s XPS signal.

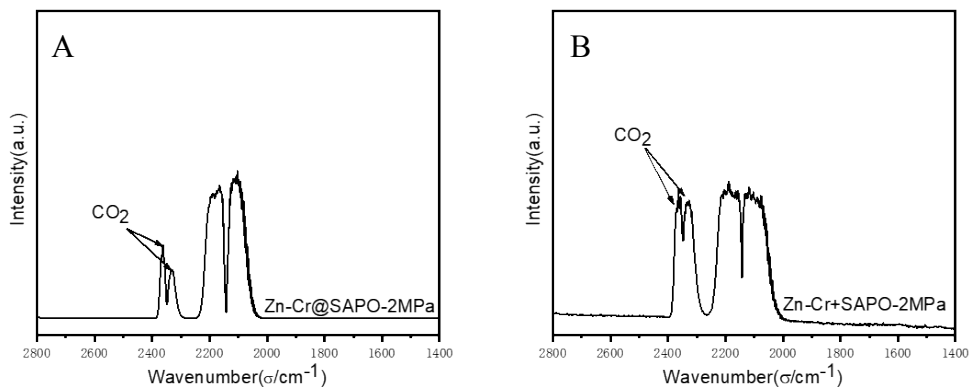

**Figure S15.** DRIFTS spectra of the physical mixture and capsule catalysts under reaction condition with a flow of syngas at 2.0 MPa, 400 °C.

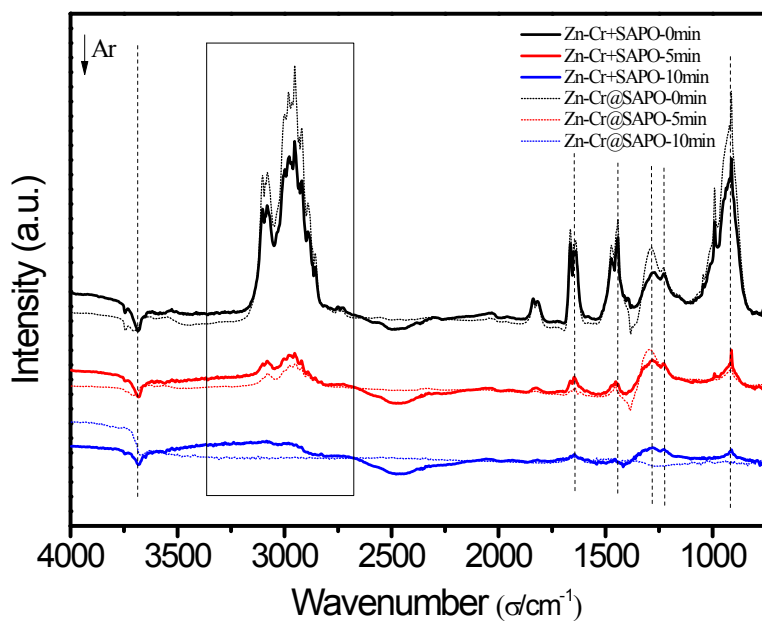

**Figure S16.** In situ FT-IR spectra of the physical mixture and capsule catalysts. The catalysts were absorption by propylene, then under a flow of Ar for 10 min at 300 °C.

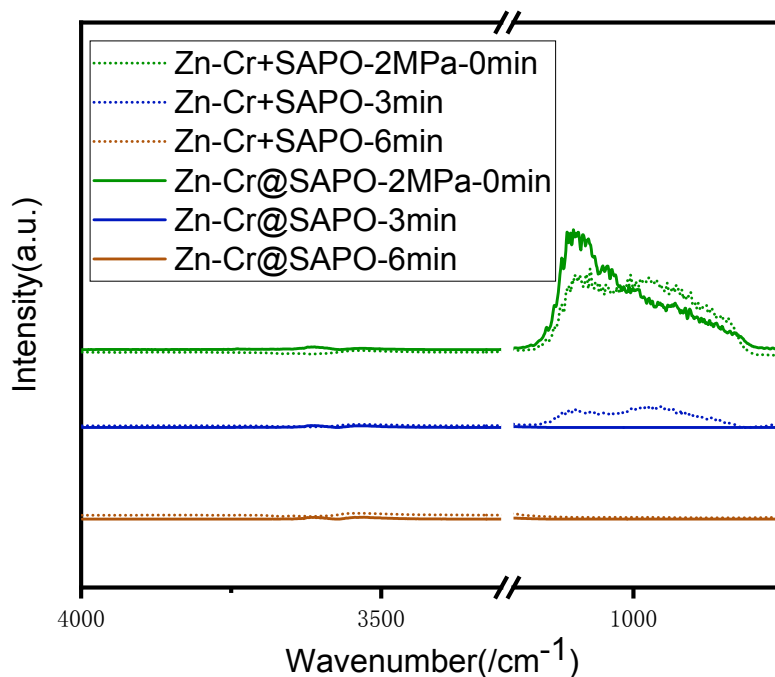

**Figure S17.** In situ FT-IR spectra of the mixture and capsule catalysts. The catalysts were absorbed by ethylene under reaction condition of 2.0 MPa, 400 °C, followed by rapidly releasing pressure, then under a flow of Ar for 6 min. The Figure S17 and S18 show light olefin is more easily removed from Zn-Cr@SAPO capsule catalyst. Herein, the hydrogenation of light olefins is limited since the core-shell structure, which leads to an increase of light olefins selectivity in STO synthesis.

## References

- [1] P.E. Blöchl, *Phys. Rev. B.* **1994**, *50*, 17953–17979.
- [2] J.P Perdew, K. Burke, *M. Phys. Rev. Lett.* **1996**, *77*, 3865–3868.
- [3] C.J. Cramer, In *Essentials of Computational Chemistry: Theories and Models*, 2nd ed.; Wiley & Sons: Chichester, U.K., **2004**.
